# Supplementary material
Source: publisher figshare collection journal article supplement (https://frontiersin.figshare.com/ndownloader/files/20135666)
Supplement: Supplementary file 1 [file 20135666]

**Supplemental Material 3**


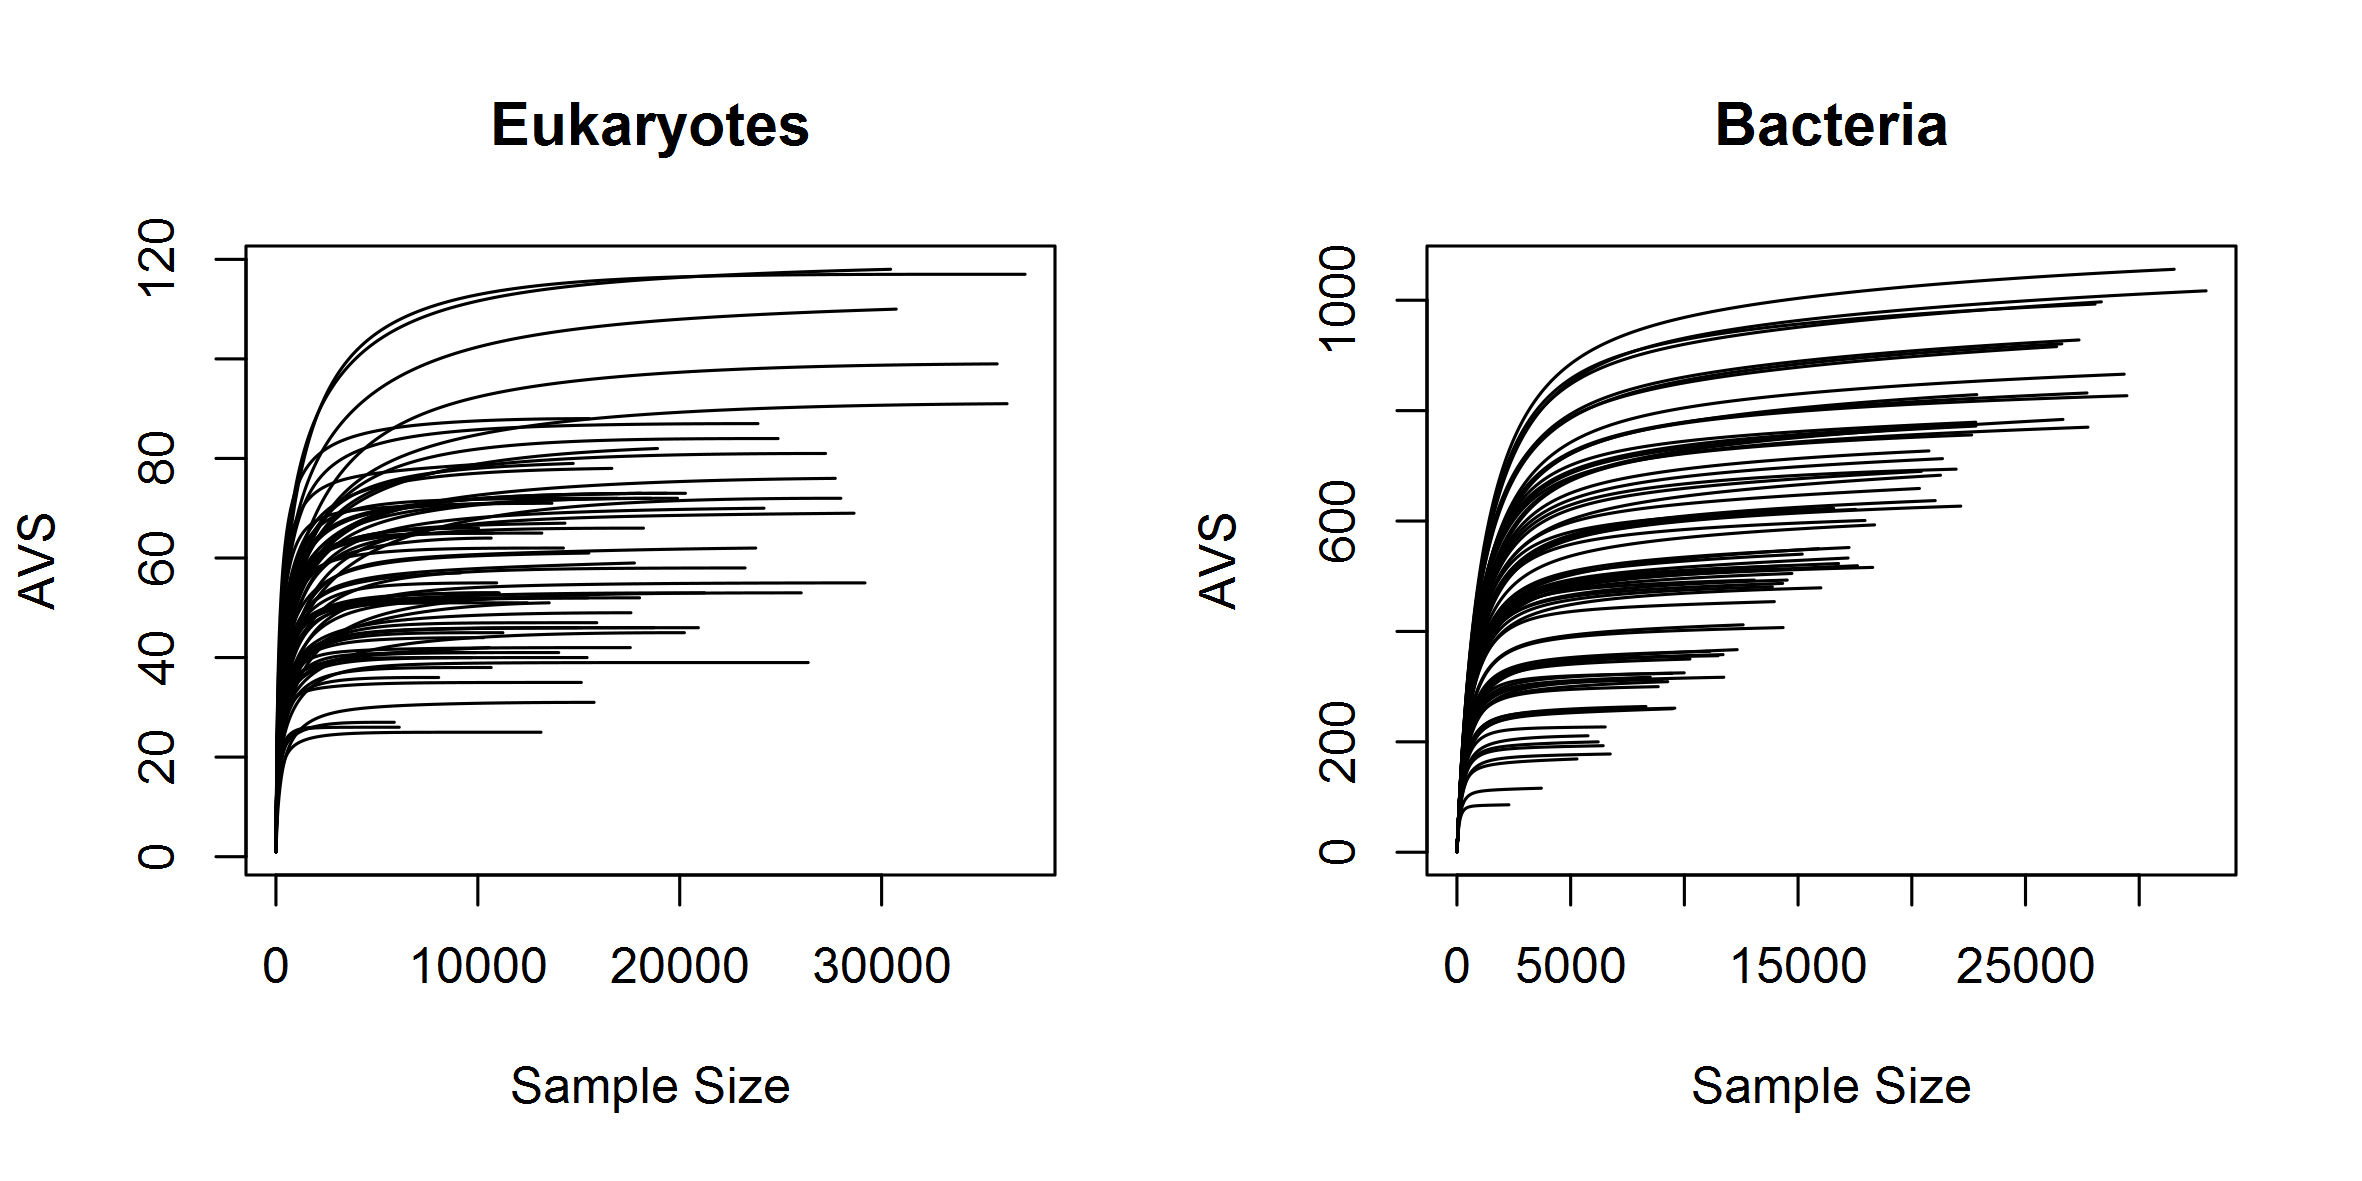


Figure 1. Rarefaction curves plotting the number of sequence reads by the number of eukaryote and bacteria Amplicon Sequence Variants (ASV) for each analysed sediment sample
